# Supplementary material for: Symbiotic Variations among Wheat Genotypes and Detection of Quantitative Trait Loci for Molecular Interaction with Auxin-Producing Azospirillum PGPR
Source: MDPI journal article supplement (doi:10.3390/microorganisms11061615), 2023-06-19
Supplement: s1 [file s1]

## Supplementary Information

### **Symbiotic Variations among Wheat Genotypes and Detection of Quantitative Trait Loci for Molecular Interaction with Auxin-Producing *Azospirillum* PGPR**

**Jordan Valente <sup>1</sup>, Florence Gerin <sup>1</sup>, Agathe Mini <sup>2</sup>, Rohan Richard <sup>2</sup>, Jacques Le Gouis <sup>2</sup>, Claire Prigent-Combaret <sup>1</sup> and Yvan Moënné-Loccoz <sup>1,\*</sup>**

<sup>1</sup> Univ Lyon, Université Claude Bernard Lyon 1, CNRS, INRAE, VetAgro Sup, UMR5557 Ecologie Microbienne, 43 Bd du 11 Novembre 1918, F-69622 Villeurbanne, France

<sup>2</sup> GDEC, INRAE, UCA, F-63000 Clermont-Ferrand, France

Running title: QTL for wheat-PGPR interaction

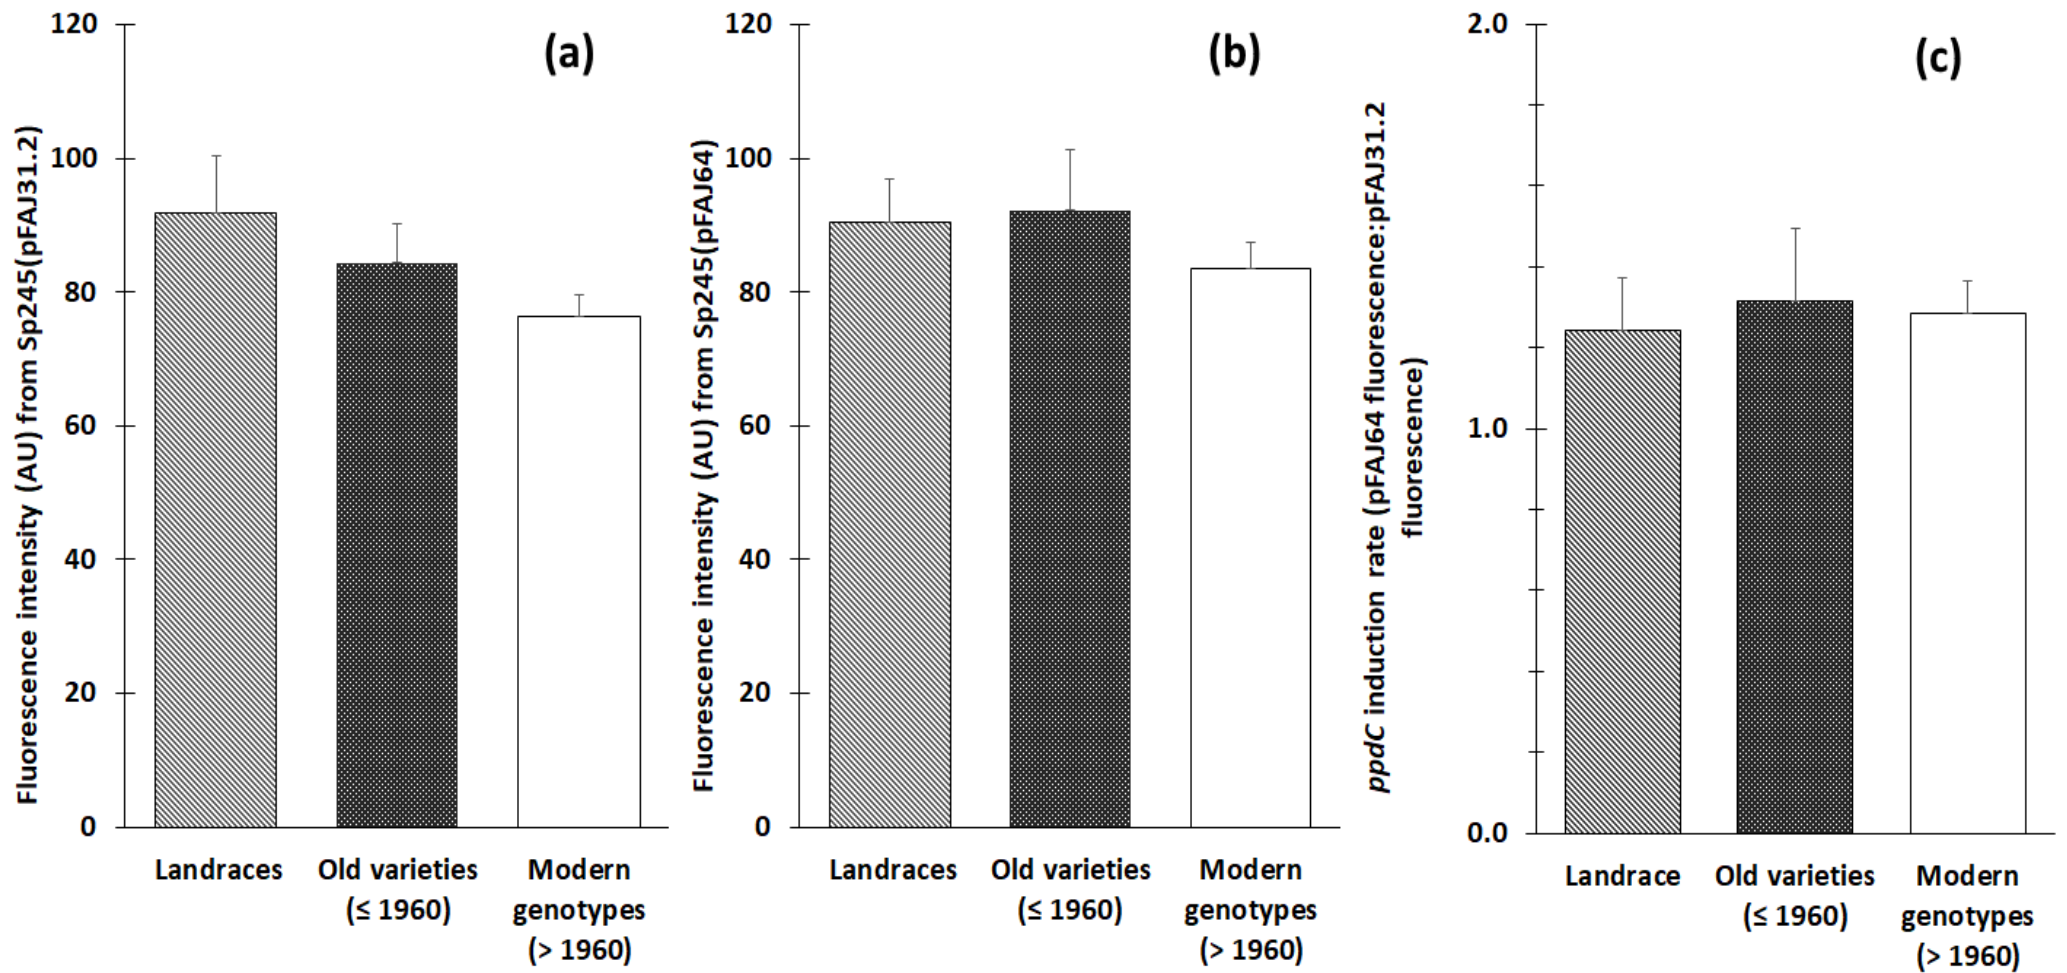

**Figure S1.** Colonization of *A. balduaniorum* Sp245(pFAJ31.2) and *ppdC* expression in Sp245(pFAJ64) on the roots of landraces (n = 33), old varieties (≤ 1960, n = 40) and modern genotypes (>1960, n = 114). Fluorescence from 4-MU is shown in (a) for the pFAJ31.2 plasmid (root colonization) and in (b) for the pFAJ64 plasmid (*ppdC* expression), whereas the *ppdC* induction rate (pFAJ64 fluorescence:pFAJ31.2 fluorescence ratio) is given in (c). Fluorescence is expressed as arbitrary units (AU) and data are presented as means (computed from individual genotype data) with standard errors. There was no significant difference at  $P < 0.05$ .

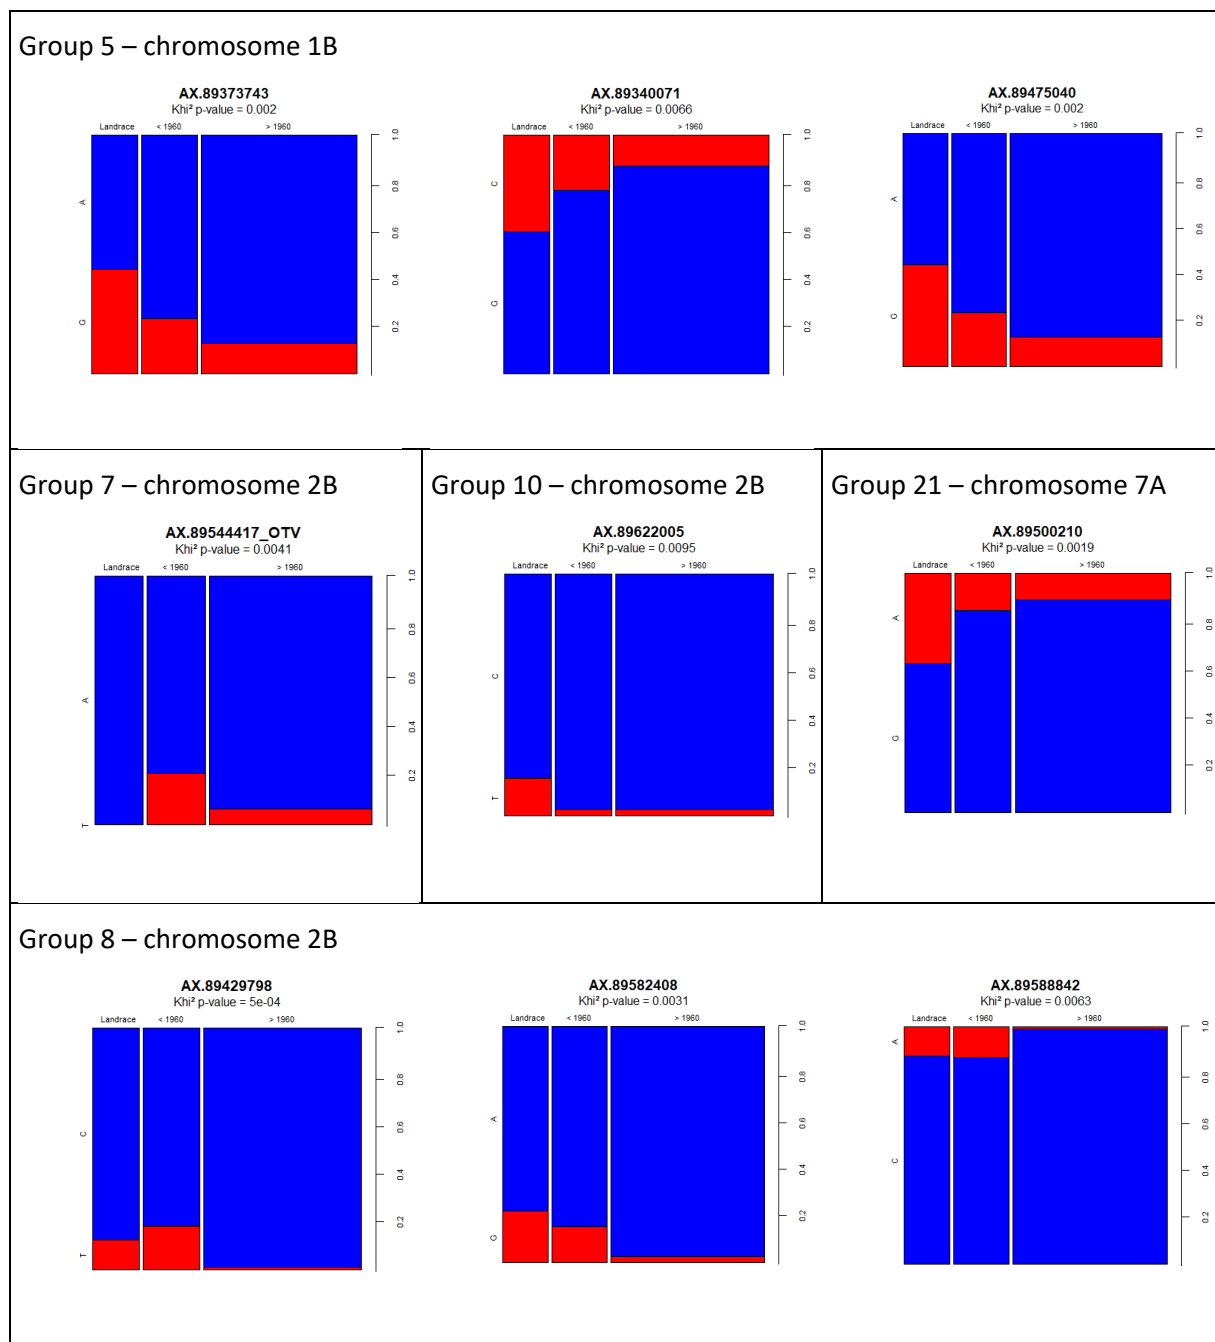

**Figure S2.** Allele proportion in the three accession classes (landraces,  $\leq 1960$ ,  $> 1960$ ) for the nine markers for which GWAS evidenced a significant difference in allele proportion (Kht<sup>2</sup> tests,  $P < 0.01$ ). Proportions corresponding to the SNP alleles indicated with letters A, G, T or C on the left of each graph are shown in blue for the major allele and in red for the minor allele. Rectangle widths are proportional to accession classes size.

**Table S1.** List of the 187 wheat genotypes used in the study and their rankings in the screening experiment of three traits: Sp245 colonization, *ppdC* expression and *ppdC* induction rate. These 187 genotypes correspond to the 184 accessions that germinated among the 196 genotypes of the 196CC core-collection sub-sampled from the 372CC collection set up by Balfourier *et al.* (2007)<sup>†</sup>, plus the reference landrace Chinese Spring and the two reference modern lines Hendrix and Skerzso. The genotypes are listed according to their ERGE code in the French National Cereal Genetic Resources database. For each of the three rankings done in the screening experiment, the worst rank was 1 and the best rank 187. The total score was obtained by summing the three ranks.

| ERGE Code | Genotype             | Geographic origin        | Genotype category | Sp245 colonization rank | <i>ppdC</i> expression rank | <i>ppdC</i> induction rate rank | Total score |
|-----------|----------------------|--------------------------|-------------------|-------------------------|-----------------------------|---------------------------------|-------------|
| 7         | (95-13*BEZOSTAIA)3-3 | France                   | > 1960            | 55                      | 40                          | 82                              | 177         |
| 19        | CH01193              | Switzerland              | > 1960            | 113                     | 122                         | 110                             | 345         |
| 92        | 11IWSWSN14           | USA                      | > 1960            | 29                      | 80                          | 143                             | 252         |
| 177       | DI15                 | France                   | > 1960            | 71                      | 28                          | 51                              | 150         |
| 234       | DI182-9              | France                   | > 1960            | 60                      | 158                         | 160                             | 378         |
| 236       | DI185                | France                   | > 1960            | 86                      | 60                          | 74                              | 220         |
| 338       | DI276                | France                   | > 1960            | 89                      | 185                         | 180                             | 454         |
| 347       | 2838-39              | Bulgaria                 | > 1960            | 34                      | 71                          | 127                             | 232         |
| 386       | DI330                | France                   | > 1960            | 5                       | 38                          | 154                             | 197         |
| 419       | DI37-12-2            | France                   | > 1960            | 140                     | 99                          | 60                              | 299         |
| 421       | 3716-1               | Bulgaria                 | > 1960            | 10                      | 74                          | 164                             | 248         |
| 477       | DI50-12              | France                   | > 1960            | 8                       | 146                         | 179                             | 333         |
| 524       | 60293-               | The Netherlands          | > 1960            | 109                     | 97                          | 92                              | 298         |
| 537       | CH62022              | Switzerland              | > 1960            | 129                     | 171                         | 140                             | 440         |
| 546       | 664-258-18           | Bulgaria                 | > 1960            | 83                      | 78                          | 98                              | 259         |
| 748       | A4                   | Afghanistan              | > 1960            | 98                      | 128                         | 122                             | 348         |
| 794       | ADMONTER             | Austria                  | ≤ 1960            | 38                      | 81                          | 125                             | 244         |
| 797       | ADULAR               | Germany                  | > 1960            | 148                     | 168                         | 124                             | 440         |
| 833       | AKADARUMA            | Japan                    | ≤ 1960            | 158                     | 179                         | 134                             | 471         |
| 871       | ALMA                 | France                   | ≤ 1960            | 9                       | 69                          | 162                             | 240         |
| 901       | AMIFORT              | France                   | > 1960            | 131                     | 180                         | 156                             | 467         |
| 957       | ARAWA                | Australia or New Zealand | ≤ 1960            | 176                     | 92                          | 16                              | 284         |
| 983       | ARGENT               | UK or Ireland            | > 1960            | 174                     | 113                         | 29                              | 316         |
| 1005      | ARKAS                | Germany                  | > 1960            | 178                     | 114                         | 26                              | 318         |
| 1032      | ARROMANCHES          | France                   | > 1960            | 102                     | 108                         | 104                             | 314         |
| 1044      | ARTOIS-DESPREZ       | France                   | ≤ 1960            | 15                      | 95                          | 157                             | 267         |
| 1080      | ATUT II              | Austria                  | > 1960            | 159                     | 151                         | 86                              | 396         |
| 1192      | BALKAN               | Croatia                  | > 1960            | 45                      | 127                         | 152                             | 324         |
| 1232      | BARBU DU FINISTERE   | France                   | Landrace          | 6                       | 118                         | 178                             | 302         |
| 1236      | BARBU DU TRONCHET    | France                   | Landrace          | 107                     | 46                          | 44                              | 197         |
| 1281      | BEL ET BON           | France                   | ≤ 1960            | 121                     | 66                          | 52                              | 239         |
| 1288      | BELLIEI 590          | Hungary                  | ≤ 1960            | 142                     | 61                          | 38                              | 241         |
| 1321      | BENNI                | USA                      | > 1960            | 101                     | 109                         | 106                             | 316         |
| 1332      | BERZATACA            | Finland                  | > 1960            | 51                      | 23                          | 66                              | 140         |
| 1357      | BIRGITTA             | Sweden                   | > 1960            | 136                     | 54                          | 30                              | 220         |
| 1400      | BLANC PRECOCE        | Switzerland              | Landrace          | 63                      | 104                         | 121                             | 288         |
| 1402      | BLASON               | France                   | > 1960            | 78                      | 42                          | 56                              | 176         |
| 1417      | BLE D'OR             | France                   | ≤ 1960            | 115                     | 30                          | 25                              | 170         |
| 1429      | BLE DE HAIE          | France                   | Landrace          | 11                      | 8                           | 107                             | 126         |
| 1446      | BLE DE MARAT BARBU   | France                   | Landrace          | 70                      | 133                         | 141                             | 344         |
| 1498      | BLE DU ROUSSILLON    | France                   | Landrace          | 151                     | 72                          | 32                              | 255         |
| 1529      | BLONDYNKA            | Poland                   | ≤ 1960            | 134                     | 111                         | 79                              | 324         |
| 1531      | BLUEBOY              | USA                      | > 1960            | 166                     | 148                         | 71                              | 385         |
| 1747      | 114/62               | Austria                  | > 1960            | 106                     | 27                          | 31                              | 164         |
| 1768      | CANDEAL DE AREVALO   | Spain                    | Landrace          | 73                      | 167                         | 165                             | 405         |

|      |                        |                          |          |     |     |     |     |
|------|------------------------|--------------------------|----------|-----|-----|-----|-----|
| 1885 | CENAD 512              | Romania                  | ≤ 1960   | 92  | 149 | 136 | 377 |
| 1899 | CEREALOR               | France                   | > 1960   | 52  | 50  | 95  | 197 |
| 1957 | CF3003-2-7-4-4-3       | France                   | > 1960   | 14  | 85  | 155 | 254 |
| 1974 | CF4563-1-5-3-2-5       | France                   | > 1960   | 135 | 94  | 58  | 287 |
| 2025 | CH73052                | Switzerland              | > 1960   | 123 | 24  | 14  | 161 |
| 2135 | CHINESE SPRING         | China                    | Landrace | 141 | 155 | 111 | 407 |
| 2145 | CHITLANG               | Nepal                    | Landrace | 46  | 160 | 167 | 373 |
| 2153 | CHORTANDINKA           | Central Asia             | > 1960   | 120 | 144 | 119 | 383 |
| 2169 | CHYAKSILA EPI NON VELU | Nepal                    | Landrace | 103 | 67  | 72  | 242 |
| 2308 | COMPTON                | USA                      | > 1960   | 108 | 15  | 17  | 140 |
| 2345 | CORSODOR               | France                   | > 1960   | 18  | 2   | 54  | 74  |
| 2364 | CP4                    | France                   | > 1960   | 85  | 62  | 78  | 225 |
| 2399 | D130-63                | Poland                   | > 1960   | 97  | 166 | 153 | 416 |
| 2424 | DANUBIA                | Czech Republic           | > 1960   | 104 | 18  | 23  | 145 |
| 2438 | DAVIDOC                | France                   | > 1960   | 26  | 77  | 144 | 247 |
| 2475 | DETENICKA CERVENA      | Czech Republic           | Landrace | 68  | 125 | 135 | 328 |
| 2489 | DI6402-34-2-4          | France                   | > 1960   | 67  | 98  | 117 | 282 |
| 2491 | DI6404-19-15           | France                   | > 1960   | 36  | 33  | 100 | 169 |
| 2507 | DI7003-1-12            | France                   | > 1960   | 112 | 25  | 24  | 161 |
| 2508 | DI7005-113-3           | France                   | > 1960   | 59  | 124 | 139 | 322 |
| 2526 | DI7202-103             | France                   | > 1960   | 77  | 184 | 182 | 443 |
| 2534 | DI7210-15-11           | France                   | > 1960   | 53  | 131 | 151 | 335 |
| 2536 | DI7215-100             | France                   | > 1960   | 186 | 136 | 12  | 334 |
| 2573 | DIANA                  | Poland                   | > 1960   | 35  | 186 | 186 | 407 |
| 2574 | DIANA II               | Czech Republic           | > 1960   | 105 | 82  | 87  | 274 |
| 2606 | DNEPROVSKAIA           | Ukraine                  | > 1960   | 21  | 83  | 150 | 254 |
| 2626 | DONG-FANG-HONG-NO3     | China                    | > 1960   | 1   | 93  | 181 | 275 |
| 2644 | DRAGON-FRA             | France                   | > 1960   | 3   | 130 | 183 | 316 |
| 2650 | DRAVA                  | Croatia                  | > 1960   | 137 | 139 | 103 | 379 |
| 2683 | E108                   | France                   | ≤ 1960   | ND  | ND  | ND  | ND  |
| 2698 | EBRO                   | Spain                    | > 1960   | 173 | 132 | 48  | 353 |
| 2802 | ESPOIR                 | France                   | ≤ 1960   | 170 | 178 | 118 | 466 |
| 2991 | FERRUGINEUM            | Russia                   | ≤ 1960   | 44  | 31  | 83  | 158 |
| 3050 | FLAMURA 85             | Romania                  | > 1960   | 114 | 70  | 67  | 251 |
| 3070 | FLINT                  | USA                      | Landrace | 163 | 119 | 47  | 329 |
| 3278 | GELPA                  | France                   | > 1960   | 87  | 84  | 96  | 267 |
| 3299 | GH126                  | France                   | > 1960   | 65  | 9   | 37  | 111 |
| 3342 | GK SZOKE               | Hungary                  | > 1960   | 110 | 73  | 73  | 256 |
| 3366 | GODOLLOI 15            | Hungary                  | ≤ 1960   | ND  | ND  | ND  | ND  |
| 3406 | GRANIT                 | Russia                   | > 1960   | 155 | 58  | 18  | 231 |
| 3414 | GRENIER                | France                   | > 1960   | 50  | 170 | 173 | 393 |
| 3485 | H93-70                 | Spain                    | > 1960   | 4   | 164 | 185 | 353 |
| 3617 | HIVERNAL               | France                   | > 1960   | 43  | 103 | 133 | 279 |
| 3753 | IAS 1                  | Brazil                   | ≤ 1960   | 96  | 110 | 108 | 314 |
| 3896 | JANGO                  | France                   | ≤ 1960   | 7   | 53  | 158 | 218 |
| 3912 | JASZSAGI TF            | Hungary                  | ≤ 1960   | 25  | 12  | 85  | 122 |
| 3970 | JUFY II                | Belgium                  | ≤ 1960   | 91  | 65  | 76  | 232 |
| 3991 | K1898-9/L200-6         | Bulgaria                 | > 1960   | 172 | 140 | 55  | 367 |
| 4036 | KATYIL                 | Australia or New Zealand | > 1960   | 19  | 3   | 69  | 91  |
| 4105 | KID                    | France                   | > 1960   | 12  | 11  | 101 | 124 |
| 4111 | KIRAC 66               | Turkey                   | > 1960   | 122 | 64  | 50  | 236 |
| 4157 | KOLBEN 3               | Sweden                   | Landrace | ND  | ND  | ND  | ND  |
| 4187 | KRAKA                  | Norway or Denmark        | > 1960   | 145 | 176 | 142 | 463 |
| 4194 | KRELOF 3               | France                   | ≤ 1960   | 133 | 152 | 114 | 399 |
| 4300 | LESZYNSKA WCZESNA      | Poland                   | ≤ 1960   | 150 | 76  | 41  | 267 |
| 4324 | LITTLE CLUB            | USA                      | Landrace | 69  | 52  | 77  | 198 |
| 4343 | LONTOI                 | Finland                  | > 1960   | 168 | 32  | 6   | 206 |
| 4525 | MALGORZATKA UDYCKA     | Poland                   | ≤ 1960   | 119 | 26  | 19  | 164 |

|       |                         |                          |          |     |     |     |     |
|-------|-------------------------|--------------------------|----------|-----|-----|-----|-----|
| 4664  | MASTER                  | UK or Ireland            | > 1960   | 144 | 121 | 81  | 346 |
| 4670  | MATRADERECSKEITF        | Hungary                  | > 1960   | 54  | 22  | 61  | 137 |
| 4838  | MINTURK                 | USA                      | ≤ 1960   | 100 | 157 | 137 | 394 |
| 4947  | MOTTIN                  | France                   | Landrace | 147 | 161 | 113 | 421 |
| 4991  | MV MA                   | Hungary                  | > 1960   | 127 | 172 | 145 | 444 |
| 5293  | NOUGAT                  | France                   | > 1960   | 28  | 162 | 177 | 367 |
| 5401  | NZ(81)P43               | Australia or New Zealand | > 1960   | 185 | 165 | 45  | 395 |
| 5421  | ODESSA EXPSTA20722      | Portugal                 | > 1960   | 62  | 10  | 40  | 112 |
| 5438  | ODESSKAYA 16            | Ukraine                  | ≤ 1960   | 23  | 7   | 80  | 110 |
| 5448  | OGOSTA                  | Bulgaria                 | > 1960   | 132 | 90  | 62  | 284 |
| 5501  | ORLANDI                 | Italy                    | ≤ 1960   | 13  | 5   | 93  | 111 |
| 5536  | OULIANOWSKA             | Russia                   | > 1960   | 116 | 29  | 22  | 167 |
| 5552  | P. DE BROLLON           | Spain                    | Landrace | 22  | 105 | 159 | 286 |
| 5558  | P4523-80                | Austria                  | > 1960   | 124 | 138 | 112 | 374 |
| 5773  | POILU DU TARN           | France                   | ≤ 1960   | 61  | 37  | 70  | 168 |
| 6027  | RECITAL                 | France                   | > 1960   | 32  | 20  | 88  | 140 |
| 6086  | RENAN                   | France                   | > 1960   | 99  | 182 | 171 | 452 |
| 6191  | RINGOT 2                | France                   | ≤ 1960   | 2   | 141 | 184 | 327 |
| 6308  | ROUGE D'ALTkirch        | France                   | Landrace | 125 | 79  | 63  | 267 |
| 6318  | ROUGE DE MARCHISSY      | Switzerland              | Landrace | 33  | 153 | 172 | 358 |
| 6529  | SEU SEUN 27             | China                    | ≤ 1960   | 157 | 175 | 129 | 461 |
| 6740  | STRUBES DICKKOPF        | Germany                  | ≤ 1960   | 181 | 100 | 13  | 294 |
| 6922  | TF6                     | France                   | ≤ 1960   | 139 | 101 | 65  | 305 |
| 6986  | TOM THUMB               | USA                      | > 1960   | 66  | 117 | 130 | 313 |
| 7011  | TOUZELLE-BLANCHE-BARBUE | France                   | Landrace | 93  | 143 | 132 | 368 |
| 7085  | TURDA 81-77             | Romania                  | > 1960   | 161 | 96  | 27  | 284 |
| 7092  | TYLER                   | USA                      | > 1960   | 20  | 35  | 115 | 170 |
| 7117  | US(59)34                | USA                      | > 1960   | 24  | 44  | 116 | 184 |
| 7166  | US(62)P66               | Colombia                 | > 1960   | ND  | ND  | ND  | ND  |
| 7279  | VALDOR                  | France                   | ≤ 1960   | 58  | 173 | 174 | 405 |
| 7490  | VPM V1-1-2-4R2-3-8-3-2  | France                   | > 1960   | 81  | 102 | 109 | 292 |
| 7585  | WATTINES                | France                   | > 1960   | 153 | 112 | 57  | 322 |
| 7848  | RONGOTEA                | Australia or New Zealand | > 1960   | 31  | 89  | 146 | 266 |
| 7968  | BLE DANOIS              | France                   | Landrace | 30  | 135 | 170 | 335 |
| 7973  | BORDEAUX 113            | France                   | Landrace | 47  | 48  | 97  | 192 |
| 7988  | CREPIN A                | France                   | ≤ 1960   | 165 | 86  | 21  | 272 |
| 8011  | INSTITUT 1802           | France                   | ≤ 1960   | 57  | 36  | 75  | 168 |
| 8048  | RALET                   | France                   | Landrace | 183 | 41  | 4   | 228 |
| 8051  | BLE BARBU DE MUROL      | France                   | Landrace | 162 | 116 | 46  | 324 |
| 8058  | ZANDA                   | Belgium                  | ≤ 1960   | 160 | 154 | 89  | 403 |
| 8073  | CORONATION              | Canada                   | ≤ 1960   | 72  | 169 | 168 | 409 |
| 8079  | KITCHENER               | Canada                   | ≤ 1960   | 88  | 150 | 138 | 376 |
| 8097  | STANLEY                 | Canada                   | ≤ 1960   | 179 | 123 | 36  | 338 |
| 8165  | NAVARRO150              | Spain                    | > 1960   | 40  | 120 | 149 | 309 |
| 8170  | WS-13 CARDENO 34/45     | Spain                    | > 1960   | ND  | ND  | ND  | ND  |
| 8194  | NEELKANT                | Syria                    | > 1960   | 64  | 134 | 147 | 345 |
| 8197  | SANUNU                  | Syria                    | > 1960   | 76  | 47  | 68  | 191 |
| 8227  | NISHIKAZE KOMUGI        | Japan                    | > 1960   | 39  | 156 | 169 | 364 |
| 8254  | CADENZA                 | France                   | > 1960   | 143 | 137 | 99  | 379 |
| 8276  | CARIBO                  | Germany                  | > 1960   | 17  | 56  | 131 | 204 |
| 8287  | DC147U                  | France                   | > 1960   | 42  | 142 | 163 | 347 |
| 8289  | TM7MB1-1                | France                   | > 1960   | 74  | 16  | 39  | 129 |
| 9024  | GENESIS                 | France                   | > 1960   | ND  | ND  | ND  | ND  |
| 9077  | NON PLUS EXTRA          | Austria                  | Landrace | 187 | 51  | 2   | 240 |
| 9087  | PRINCE LEOPOLD          | Belgium                  | ≤ 1960   | 154 | 174 | 126 | 454 |
| 13210 | SOLARIS                 | Czech Republic           | > 1960   | 49  | 57  | 105 | 211 |
| 13282 | ANATOLIE2               | France                   | ≤ 1960   | 177 | 63  | 9   | 249 |
| 13292 | CONCURRENT              | France                   | ≤ 1960   | 182 | 145 | 43  | 370 |

|       |                                  |                 |          |     |     |     |     |
|-------|----------------------------------|-----------------|----------|-----|-----|-----|-----|
| 13310 | FRUH-WEIZEN                      | Germany         | Landrace | ND  | ND  | ND  | ND  |
| 13436 | FONDARD CRESPI                   | France          | ≤ 1960   | 94  | 34  | 42  | 170 |
| 13445 | VOLT                             | Hungary         | > 1960   | 16  | 147 | 176 | 339 |
| 13454 | SPONSOR                          | France          | > 1960   | ND  | ND  | ND  | ND  |
| 13461 | BEHERT                           | France          | > 1960   | 95  | 21  | 28  | 144 |
| 13471 | ORNICAR                          | France          | > 1960   | 184 | 4   | 1   | 189 |
| 13481 | APACHE                           | France          | > 1960   | 128 | 181 | 161 | 470 |
| 13494 | BELLOVAC                         | France          | > 1960   | 79  | 91  | 102 | 272 |
| 13500 | ORFIELD                          | France          | > 1960   | 130 | 39  | 20  | 189 |
| 13502 | PALIO                            | France          | > 1960   | 27  | 13  | 84  | 124 |
| 13792 | CENTURK                          | USA             | > 1960   | 37  | 106 | 148 | 291 |
| 13861 | AUGUSTE                          | France          | > 1960   | 117 | 159 | 128 | 404 |
| 13870 | TALISMAN                         | France          | > 1960   | 111 | 59  | 59  | 229 |
| 14000 | ROKYCANSKA SAMETKA               | Czech Republic  | Landrace | 48  | 88  | 123 | 259 |
| 14011 | HANA                             | Czech Republic  | > 1960   | 90  | 75  | 90  | 255 |
| 15606 | BLE DE REDON BLANC BARBU 1 1     | France          | Landrace | 156 | 55  | 15  | 226 |
| 15658 | BLE DE REDON BLANC 1/2 LACHE 1 1 | France          | Landrace | 118 | 183 | 175 | 476 |
| 15710 | BLE DE REDON GLUMES VELUES 1     | France          | Landrace | 146 | 129 | 91  | 366 |
| 15950 | AS68VM4-3-2/TJB636 13            | France          | > 1960   | 82  | 19  | 35  | 136 |
| 15954 | ASVM4/BEAUCHAMP 81B13            | France          | > 1960   | 126 | 68  | 49  | 243 |
| 20074 | MIRLEBEN                         | Ukraine         | > 1960   | 164 | 6   | 3   | 173 |
| 20224 | FANTASIYA-ODESSKAYA              | Ukraine         | > 1960   | ND  | ND  | ND  | ND  |
| 20276 | EQUINOX                          | UK or Ireland   | > 1960   | 152 | 45  | 11  | 208 |
| 20366 | SKERZZO                          | France          | > 1960   | 149 | 14  | 7   | 170 |
| 20384 | DI9234-11-15                     | France          | > 1960   | 75  | 1   | 8   | 84  |
| 20417 | HAMAC                            | The Netherlands | > 1960   | ND  | ND  | ND  | ND  |
| 24031 | KRASNAYA                         | Canada          | Landrace | 180 | 87  | 10  | 277 |
| 24058 | SARI-BUGDA                       | Caucasia        | Landrace | 175 | 115 | 33  | 323 |
| 24066 | CROISEMENT 268                   | Switzerland     | ≤ 1960   | 80  | 43  | 53  | 176 |
| 24075 | SPIN, 121-VAR.12/536             | Pakistan        | ≤ 1960   | 41  | 187 | 187 | 415 |
| 24089 | TAU-BUGDA                        | Caucasia        | Landrace | 167 | 107 | 34  | 308 |
| 24108 | ALBIDUM 12                       | Russia          | > 1960   | 138 | 126 | 94  | 358 |
| 24193 | LANDRACE                         | Caucasia        | Landrace | 171 | 17  | 5   | 193 |
| 24196 | ARABUGDASI                       | Caucasia        | Landrace | 169 | 177 | 120 | 466 |
| 24210 | LAMMAS                           | UK or Ireland   | Landrace | 56  | 163 | 166 | 385 |
| 28978 | HENDRIX                          | France          | > 1960   | 84  | 49  | 64  | 197 |

† Balfourier F, Roussel V, Strelchenko P, Exbrayat-Vinson F, Sourdille P, Boutet G *et al.* 2007. A worldwide bread wheat core collection arrayed in a 384-well plate. Theoretical and Applied Genetics **114**, 1265–1275.

**Table S2.** Percentages of wheat genotypes showing the highest and lowest values of root colonization by *A. baldaniorum* Sp245 or *ppdC* expression in root-colonizing Sp245 among the landraces (n = 33), old varieties ( $\leq 1960$ , n = 40) and modern genotypes ( $>1960$ , n = 114).

|                                          | Landraces             | Old varieties<br>( $\leq 1960$ ) | Modern genotypes<br>( $> 1960$ ) |
|------------------------------------------|-----------------------|----------------------------------|----------------------------------|
| <b><i>Root colonization by Sp245</i></b> |                       |                                  |                                  |
| 25 best genotypes                        | 24.2 %                | 17.5 %                           | 8.8 %                            |
| 50 best genotypes                        | 42.4 % a <sup>†</sup> | 35.0 % ab                        | 19.3 % b                         |
| 50 worst genotypes                       | 24.2 %                | 25.0 %                           | 28.1 %                           |
| 25 worst genotypes                       | 9.1 %                 | 17.5 %                           | 13.2 %                           |
| <b><i>ppdC expression in Sp245</i></b>   |                       |                                  |                                  |
| 25 best genotypes                        | 12.1 %                | 17.5 %                           | 12.3 %                           |
| 50 best genotypes                        | 27.3 %                | 35.0 %                           | 23.8 %                           |
| 50 worst genotypes                       | 15.2 %                | 25.0 %                           | 30.7 %                           |
| 25 worst genotypes                       | 6.1 % a               | 7.5 %                            | 17.5 %                           |

<sup>†</sup>For each row, significant differences between landraces, old varieties and modern genotypes are indicated by letters a and b ( $\chi^2$  tests carried out on numbers of genotypes,  $P < 0.05$ ).



**Table S3.** Relative impact of combined stress on the growth of eight non-inoculated wheat genotypes. Concurrent, Coronation, Amifort and D130-63 are Sp245-stimulating genotypes, Jaszaji TF, Odesskaya 16, Danubia and Hendrix are non Sp245-stimulating genotypes. For each of the eight plant parameters investigated, the relative impacts were computed as (stress – optimum)/optimum. For each genotype, significant differences between stressed plants and controls are indicated in bold. Statistical level is indicated with \* ( $P < 0.05$ ), \*\* ( $P < 0.01$ ) or \*\*\* ( $P < 0.001$ ), based on ANOVA and Fisher's LSD tests on raw plant values.

|              | Root volume<br>(cm <sup>3</sup> ) | Fresh root<br>biomass (mg) | Dry root<br>biomass (mg) | Number of<br>roots | Root average<br>diameter (mm) | Root length<br>(cm) | Fresh shoot<br>biomass (mg) | Dry shoot<br>biomass (mg) |
|--------------|-----------------------------------|----------------------------|--------------------------|--------------------|-------------------------------|---------------------|-----------------------------|---------------------------|
| Concurrent   | -32.4%                            | -32.5%                     | -22.5%                   | 22.6%              | <b>-10.3%*</b>                | 20.2%               | <b>-48.8% ***</b>           | <b>-49.4% ***</b>         |
| Coronation   | -24.6%                            | -29.1%                     | -24.5%                   | 19.7%              | <b>-20.1% ***</b>             | -16.4%              | <b>-36.8% *</b>             | -31.3%                    |
| Amifort      | -20.0%                            | -16.5%                     | -21.9%                   | 4.5%               | <b>-19.3% ***</b>             | -1.3%               | <b>-54.7% ***</b>           | <b>-56.6% ***</b>         |
| D130-63      | <b>-39.0% *</b>                   | -26.5%                     | -16.4%                   | 4.0%               | 8.1%                          | 17.6%               | <b>-49.4% ***</b>           | <b>-43.3% **</b>          |
| Jaszaji TF   | <b>-47.1% *</b>                   | -25.3%                     | -18.6%                   | -8.2%              | <b>-23.7% ***</b>             | 2.1%                | <b>-47.9% ***</b>           | <b>-45.1% ***</b>         |
| Odesskaya 16 | -22.9%                            | -13.7%                     | -26.1%                   | 2.3%               | 2.2%                          | 25.4%               | <b>-40.1% *</b>             | <b>-42.3% *</b>           |
| Danubia      | <b>-54.8% *</b>                   | <b>-43.7% **</b>           | -17.4%                   | -13.1%             | <b>-13.4% *</b>               | -17.6%              | <b>-42.3% **</b>            | <b>-43.6% **</b>          |
| Hendrix      | <b>-59.0% ***</b>                 | <b>-55.1% ***</b>          | <b>-59.2% ***</b>        | -6.1%              | <b>-15.5% **</b>              | <b>-37.3%*</b>      | -19.92%                     | -16.7%                    |

**Table S4.** Relative impact of seed inoculation with *A. baldaniorum* Sp245 on the growth of eight wheat genotypes under optimum or combined stress conditions. Concurrent, Coronation, Amifort and D130-63 are Sp245-stimulating genotypes, Jaszaji TF, Odesskaya 16, Danubia and Hendrix are non Sp245-stimulating genotypes. For each of the eight plant parameters investigated, the relative impacts were computed as (inoculated – non-inoculated)/non-inoculated. For each genotype, significant differences between inoculated plants and controls are indicated in bold. Statistical level is indicated with \* ( $P < 0.05$ ), \*\* ( $P < 0.01$ ) or \*\*\* ( $P < 0.001$ ), based on ANOVA and Fisher's LSD tests on raw plant values.

|                |              | Root volume<br>(cm <sup>3</sup> ) | Fresh root<br>biomass (mg) | Dry root<br>biomass (mg) | Number of<br>roots | Root average<br>diameter<br>(mm) | Root length<br>(cm) | Fresh shoot<br>biomass (mg) | Dry shoot<br>biomass (mg) |
|----------------|--------------|-----------------------------------|----------------------------|--------------------------|--------------------|----------------------------------|---------------------|-----------------------------|---------------------------|
| <b>Optimum</b> | Concurrent   | 61.9%                             | 32.4%                      | <b>38.9% *</b>           | <b>94.6% **</b>    | 4.9%                             | 12.0%               | 2.9%                        | 3.5%                      |
|                | Coronation   | 10.3%                             | 10.1%                      | 8.6%                     | 21.1%              | 2.5%                             | 1.9%                | 8.0%                        | 4.4%                      |
|                | Amifort      | 37.2%                             | 16.6%                      | 16.6%                    | 48.6%              | -0.5%                            | 4.7%                | 1.0%                        | -4.4%                     |
|                | D130-63      | -1.7%                             | 3.2%                       | 6.9%                     | 0.8%               | 1.5%                             | 4.3%                | 14.8%                       | 9.9%                      |
|                | Jaszaji TF   | 4.3%                              | 3.0%                       | -4.4%                    | 1.1%               | -4.0%                            | 8.4%                | 2.1%                        | -3.8%                     |
|                | Odesskaya 16 | 18.6%                             | 17.8%                      | 16.6%                    | 21.3%              | 2.9%                             | 4.0%                | -2.4%                       | -1.0%                     |
|                | Danubia      | 14.4%                             | 7.7%                       | 10.8%                    | 11.6%              | 2.3%                             | 4.0%                | 8.6%                        | 10.2%                     |
|                | Hendrix      | 5.5%                              | 1.6%                       | -6.2%                    | 10.2%              | -2.3%                            | 9.8%                | 0.0%                        | -4.9%                     |
| <b>Stress</b>  | Concurrent   | <b>75.8% *</b>                    | <b>54.2% **</b>            | <b>57.0% **</b>          | <b>80.6% ***</b>   | -2.5%                            | 15.4%               | 9.2%                        | 9.9%                      |
|                | Coronation   | 38.4%                             | 19.9%                      | 25.9%                    | <b>88.3% ***</b>   | 2.1%                             | 8.8%                | 13.5%                       | 15.6%                     |
|                | Amifort      | <b>49.6% *</b>                    | <b>43.2% **</b>            | <b>52.2% **</b>          | <b>86.3% ***</b>   | 7.9%                             | 14.5%               | 6.4%                        | 6.3%                      |
|                | D130-63      | 7.3%                              | 9.6%                       | 6.8%                     | 6.4%               | -5.4%                            | 5.1%                | 6.9%                        | 16.1%                     |
|                | Jaszaji TF   | 12.4%                             | 13.7%                      | 7.5%                     | 11.1%              | 0.2%                             | 1.1%                | -5.8%                       | 0.6%                      |
|                | Odesskaya 16 | 17.8%                             | 17.8%                      | 21.5%                    | 37.4%              | -3.5%                            | 1.9%                | 5.9%                        | 9.3%                      |
|                | Danubia      | 12.2%                             | 10.7%                      | 10.2%                    | 18.9%              | 2.4%                             | -14.9%              | 2.4%                        | 3.1%                      |
|                | Hendrix      | 4.8%                              | 3.2%                       | 7.1%                     | 10.2%              | 5.0%                             | -3.3%               | -1.1%                       | 1.7%                      |

**Table S5.** Detection of genetic markers in wheat genome involved in interactions with *A. balduaniorum* Sp245<sup>†</sup>. The group number identifies the QTL where the markers are located. The trait indicates the type of result linked to the genetic markers, i.e. bacterial strain name (Sp245) plus bacterial trait (Exp for *ppdC* expression and Ind for *ppdC* induction rate) plus metrics (Moy for mean and Med for median). The marker designates the name of the SNP. The position corresponds to the physical position of the markers on wheat chromosomes (based on Chinese Spring RefSeqv1.0). A and B stand for major allele and minor allele, respectively. NoMeasured indicates the number of accessions measured. NbA is the number of accessions with the major allele and NbB the number of accessions with the minor allele. EffB indicates the effect of the minor allele on the trait and SE\_effB the standard error of the effect of the minor allele. p\_Marker is the *P* value and -log<sub>10</sub>(*P*) the positive log value. Khi<sup>2</sup> was used to test the hypothesis that the three accessions classes (landraces, ≤ 1960, > 1960) have the same marker allele proportions, and highly significant (*P* < 0.01) differences (found on nine occasions) are indicated in bold.

| Group | Trait         | Marker          | Chromosome | Position  | A | B | NoMeasured | NbA | NbB | effB  | SE_effB | p_Marker | -log <sub>10</sub> ( <i>P</i> ) | Khi <sup>2</sup> |
|-------|---------------|-----------------|------------|-----------|---|---|------------|-----|-----|-------|---------|----------|---------------------------------|------------------|
| 1     | Sp245.Ind.Moy | AX.89366874_OTV | 1A         | 20415992  | A | T | 174        | 164 | 10  | 0.91  | 0.1978  | 4.10E-06 | 5.39                            | 0.0127           |
| 2     | Sp245.Exp.Med | AX.89451818     | 1B         | 12806570  | T | A | 175        | 145 | 30  | 20.66 | 4.6487  | 8.82E-06 | 5.05                            | 0.0666           |
| 3     | Sp245.Exp.Med | AX.89653443     | 1B         | 97489862  | G | A | 176        | 162 | 14  | 28.98 | 6.4564  | 7.16E-06 | 5.14                            | 0.0714           |
| 3     | Sp245.Exp.Med | AX.89652072     | 1B         | 97619942  | T | A | 176        | 162 | 14  | 28.98 | 6.4564  | 7.16E-06 | 5.14                            | 0.0714           |
| 3     | Sp245.Exp.Med | AX.89346256     | 1B         | 99959384  | C | T | 176        | 164 | 12  | 33.94 | 6.9310  | 9.75E-07 | 6.01                            | 0.0462           |
| 3     | Sp245.Exp.Med | AX.89335073     | 1B         | 100561973 | C | A | 175        | 163 | 12  | 35.33 | 6.9325  | 3.47E-07 | 6.46                            | 0.1887           |
| 3     | Sp245.Exp.Med | AX.89367916     | 1B         | 102627427 | T | G | 176        | 163 | 13  | 32.14 | 6.6795  | 1.49E-06 | 5.83                            | 0.0906           |
| 3     | Sp245.Exp.Med | AX.89496064     | 1B         | 102671353 | A | G | 176        | 163 | 13  | 32.14 | 6.6795  | 1.49E-06 | 5.83                            | 0.0906           |
| 4     | Sp245.Exp.Med | AX.89462719     | 1B         | 651548215 | C | T | 176        | 167 | 9   | 37.38 | 7.9310  | 2.43E-06 | 5.61                            | 0.1020           |
| 5     | Sp245.Exp.Med | AX.89373743     | 1B         | 668109643 | A | G | 176        | 141 | 35  | 21.08 | 4.3769  | 1.46E-06 | 5.84                            | <b>0.0020</b>    |
| 5     | Sp245.Exp.Med | AX.89415492     | 1B         | 668122408 | G | C | 176        | 144 | 32  | 20.92 | 4.5295  | 3.87E-06 | 5.41                            | 0.0117           |
| 5     | Sp245.Exp.Med | AX.89340071     | 1B         | 668125848 | G | C | 176        | 142 | 34  | 22.08 | 4.4251  | 6.05E-07 | 6.22                            | <b>0.0066</b>    |
| 5     | Sp245.Exp.Med | AX.89475040     | 1B         | 668126415 | A | G | 176        | 141 | 35  | 21.08 | 4.3769  | 1.46E-06 | 5.84                            | <b>0.0020</b>    |
| 6     | Sp245.Exp.Med | AX.89715338     | 2A         | 120681877 | C | T | 176        | 168 | 8   | 37.88 | 8.3871  | 6.30E-06 | 5.20                            | 0.9160           |
| 6     | Sp245.Exp.Med | AX.89757505     | 2A         | 123202999 | A | G | 176        | 167 | 9   | 35.28 | 7.9310  | 8.66E-06 | 5.06                            | 0.6496           |
| 7     | Sp245.Exp.Med | AX.89544417_OTV | 2B         | 23006356  | A | T | 176        | 161 | 15  | 28.08 | 6.2568  | 7.20E-06 | 5.14                            | <b>0.0041</b>    |
| 8     | Sp245.Exp.Med | AX.89701067     | 2B         | 572314013 | T | C | 176        | 136 | 40  | 20.09 | 4.1688  | 1.44E-06 | 5.84                            | 0.0632           |
| 8     | Sp245.Exp.Med | AX.89558788     | 2B         | 572321667 | C | T | 176        | 166 | 10  | 36.92 | 7.5467  | 9.96E-07 | 6.00                            | 0.0213           |
| 8     | Sp245.Exp.Med | AX.89588842     | 2B         | 572557343 | C | A | 176        | 167 | 9   | 40.17 | 7.9310  | 4.08E-07 | 6.39                            | <b>0.0063</b>    |
| 8     | Sp245.Exp.Med | AX.89608961     | 2B         | 572586442 | C | T | 176        | 167 | 9   | 36.15 | 7.9310  | 5.18E-06 | 5.29                            | 0.0245           |
| 8     | Sp245.Exp.Med | AX.89400900     | 2B         | 572622617 | C | T | 176        | 166 | 10  | 36.92 | 7.5467  | 9.96E-07 | 6.00                            | 0.0213           |
| 8     | Sp245.Exp.Med | AX.89735345     | 2B         | 572670087 | C | A | 176        | 167 | 9   | 41.17 | 7.9310  | 2.09E-07 | 6.68                            | 0.0245           |

|   |               |             |    |           |   |   |     |     |    |       |        |          |      |        |
|---|---------------|-------------|----|-----------|---|---|-----|-----|----|-------|--------|----------|------|--------|
| 8 | Sp245.Exp.Med | AX.89472541 | 2B | 572789475 | T | C | 176 | 166 | 10 | 36.92 | 7.5467 | 9.96E-07 | 6.00 | 0.0213 |
| 8 | Sp245.Exp.Med | AX.89625338 | 2B | 573052357 | A | T | 176 | 166 | 10 | 36.92 | 7.5467 | 9.96E-07 | 6.00 | 0.0213 |
| 8 | Sp245.Exp.Med | AX.89582408 | 2B | 573199626 | A | G | 176 | 161 | 15 | 30.38 | 6.2568 | 1.20E-06 | 5.92 | 0.0031 |
| 8 | Sp245.Exp.Med | AX.89656849 | 2B | 573203394 | A | G | 176 | 167 | 9  | 41.17 | 7.9310 | 2.09E-07 | 6.68 | 0.0245 |
| 8 | Sp245.Exp.Med | AX.89451317 | 2B | 573205653 | C | T | 176 | 128 | 48 | 17.41 | 3.9227 | 9.11E-06 | 5.04 | 0.0461 |
| 8 | Sp245.Exp.Med | AX.89474485 | 2B | 573205674 | C | T | 176 | 128 | 48 | 17.41 | 3.9227 | 9.11E-06 | 5.04 | 0.0461 |
| 8 | Sp245.Exp.Med | AX.89716141 | 2B | 573205718 | T | C | 176 | 166 | 10 | 36.92 | 7.5467 | 9.96E-07 | 6.00 | 0.0213 |
| 8 | Sp245.Exp.Med | AX.89546023 | 2B | 573207779 | T | G | 176 | 128 | 48 | 17.41 | 3.9227 | 9.11E-06 | 5.04 | 0.0461 |
| 8 | Sp245.Exp.Med | AX.89435742 | 2B | 573210497 | C | T | 176 | 128 | 48 | 17.41 | 3.9227 | 9.11E-06 | 5.04 | 0.0461 |
| 8 | Sp245.Exp.Med | AX.89604763 | 2B | 573219613 | G | A | 176 | 166 | 10 | 36.92 | 7.5467 | 9.96E-07 | 6.00 | 0.0213 |
| 8 | Sp245.Exp.Med | AX.89392471 | 2B | 573593898 | C | G | 176 | 166 | 10 | 36.92 | 7.5467 | 9.96E-07 | 6.00 | 0.0213 |
| 8 | Sp245.Exp.Med | AX.89536611 | 2B | 573672989 | C | A | 176 | 166 | 10 | 36.92 | 7.5467 | 9.96E-07 | 6.00 | 0.0213 |
| 8 | Sp245.Exp.Med | AX.89508647 | 2B | 573688461 | T | C | 174 | 164 | 10 | 36.82 | 7.5493 | 1.08E-06 | 5.97 | 0.0235 |
| 8 | Sp245.Exp.Med | AX.89712625 | 2B | 573688492 | C | A | 176 | 166 | 10 | 36.92 | 7.5467 | 9.96E-07 | 6.00 | 0.0213 |
| 8 | Sp245.Exp.Med | AX.89543231 | 2B | 573720522 | C | T | 176 | 166 | 10 | 36.92 | 7.5467 | 9.96E-07 | 6.00 | 0.0213 |
| 8 | Sp245.Exp.Med | AX.89576079 | 2B | 574041955 | T | C | 176 | 129 | 47 | 18.15 | 3.9488 | 4.27E-06 | 5.37 | 0.0312 |
| 8 | Sp245.Exp.Med | AX.89635740 | 2B | 574042114 | G | T | 176 | 166 | 10 | 36.92 | 7.5467 | 9.96E-07 | 6.00 | 0.0213 |
| 8 | Sp245.Exp.Med | AX.89386011 | 2B | 574043333 | G | C | 176 | 166 | 10 | 36.92 | 7.5467 | 9.96E-07 | 6.00 | 0.0213 |
| 8 | Sp245.Exp.Med | AX.89345560 | 2B | 574693828 | T | C | 176 | 127 | 49 | 17.38 | 3.8977 | 8.19E-06 | 5.09 | 0.0662 |
| 8 | Sp245.Exp.Med | AX.89388511 | 2B | 574709328 | G | A | 176 | 127 | 49 | 17.38 | 3.8977 | 8.19E-06 | 5.09 | 0.0662 |
| 8 | Sp245.Exp.Med | AX.89338777 | 2B | 574710599 | A | G | 176 | 127 | 49 | 17.38 | 3.8977 | 8.19E-06 | 5.09 | 0.0662 |
| 8 | Sp245.Exp.Med | AX.89764839 | 2B | 574712159 | C | A | 176 | 166 | 10 | 36.92 | 7.5467 | 9.96E-07 | 6.00 | 0.0213 |
| 8 | Sp245.Exp.Med | AX.89584393 | 2B | 574712834 | A | G | 176 | 127 | 49 | 17.38 | 3.8977 | 8.19E-06 | 5.09 | 0.0662 |
| 8 | Sp245.Exp.Med | AX.89417406 | 2B | 574713427 | C | T | 176 | 127 | 49 | 17.38 | 3.8977 | 8.19E-06 | 5.09 | 0.0662 |
| 8 | Sp245.Exp.Med | AX.89479386 | 2B | 574713488 | C | T | 176 | 166 | 10 | 36.92 | 7.5467 | 9.96E-07 | 6.00 | 0.0213 |
| 8 | Sp245.Exp.Med | AX.89477474 | 2B | 574715971 | A | G | 176 | 127 | 49 | 17.38 | 3.8977 | 8.19E-06 | 5.09 | 0.0662 |
| 8 | Sp245.Exp.Med | AX.89464190 | 2B | 574716544 | G | A | 176 | 167 | 9  | 36.15 | 7.9310 | 5.18E-06 | 5.29 | 0.0245 |
| 8 | Sp245.Exp.Med | AX.89626581 | 2B | 575115755 | C | A | 176 | 127 | 49 | 17.38 | 3.8977 | 8.19E-06 | 5.09 | 0.0662 |
| 8 | Sp245.Exp.Med | AX.89416120 | 2B | 575147373 | A | G | 176 | 130 | 46 | 18.39 | 3.9761 | 3.76E-06 | 5.42 | 0.0205 |
| 8 | Sp245.Exp.Med | AX.89465706 | 2B | 575147405 | C | T | 176 | 166 | 10 | 36.92 | 7.5467 | 9.96E-07 | 6.00 | 0.0213 |
| 8 | Sp245.Exp.Med | AX.89384765 | 2B | 575147497 | T | A | 176 | 166 | 10 | 36.92 | 7.5467 | 9.96E-07 | 6.00 | 0.0213 |

|    |               |             |    |           |   |   |     |     |    |       |        |          |      |        |
|----|---------------|-------------|----|-----------|---|---|-----|-----|----|-------|--------|----------|------|--------|
| 8  | Sp245.Exp.Med | AX.89701142 | 2B | 575148227 | A | G | 176 | 130 | 46 | 18.39 | 3.9761 | 3.76E-06 | 5.42 | 0.0205 |
| 8  | Sp245.Exp.Med | AX.89589714 | 2B | 575149606 | A | T | 176 | 127 | 49 | 17.38 | 3.8977 | 8.19E-06 | 5.09 | 0.0662 |
| 8  | Sp245.Exp.Med | AX.89343018 | 2B | 575149623 | T | C | 176 | 127 | 49 | 17.38 | 3.8977 | 8.19E-06 | 5.09 | 0.0662 |
| 8  | Sp245.Exp.Med | AX.89374062 | 2B | 575165223 | A | G | 176 | 130 | 46 | 18.39 | 3.9761 | 3.76E-06 | 5.42 | 0.0205 |
| 8  | Sp245.Exp.Med | AX.89426922 | 2B | 575171812 | A | G | 176 | 127 | 49 | 17.38 | 3.8977 | 8.19E-06 | 5.09 | 0.0662 |
| 8  | Sp245.Exp.Med | AX.89419933 | 2B | 575174058 | C | T | 173 | 129 | 44 | 18.83 | 4.0463 | 3.27E-06 | 5.49 | 0.0320 |
| 8  | Sp245.Exp.Med | AX.89743901 | 2B | 575176667 | G | C | 176 | 127 | 49 | 17.38 | 3.8977 | 8.19E-06 | 5.09 | 0.0662 |
| 8  | Sp245.Exp.Med | AX.89429798 | 2B | 575235683 | C | T | 176 | 164 | 12 | 33.53 | 6.9310 | 1.31E-06 | 5.88 | 0.0005 |
| 8  | Sp245.Exp.Med | AX.89434650 | 2B | 575339365 | C | T | 176 | 167 | 9  | 41.75 | 7.9310 | 1.41E-07 | 6.85 | 0.0171 |
| 8  | Sp245.Exp.Med | AX.89351473 | 2B | 575377838 | T | C | 176 | 127 | 49 | 17.38 | 3.8977 | 8.19E-06 | 5.09 | 0.0662 |
| 8  | Sp245.Exp.Med | AX.89593657 | 2B | 575385248 | A | G | 176 | 127 | 49 | 17.38 | 3.8977 | 8.19E-06 | 5.09 | 0.0662 |
| 8  | Sp245.Exp.Med | AX.89387691 | 2B | 575706535 | G | C | 176 | 166 | 10 | 36.92 | 7.5467 | 9.96E-07 | 6.00 | 0.0213 |
| 8  | Sp245.Exp.Med | AX.89457236 | 2B | 575706596 | C | T | 176 | 166 | 10 | 36.92 | 7.5467 | 9.96E-07 | 6.00 | 0.0213 |
| 8  | Sp245.Exp.Med | AX.89521523 | 2B | 575706667 | C | T | 175 | 165 | 10 | 36.95 | 7.5480 | 9.84E-07 | 6.01 | 0.0224 |
| 8  | Sp245.Exp.Med | AX.89335163 | 2B | 575837447 | G | A | 174 | 138 | 36 | 22.74 | 4.3375 | 1.58E-07 | 6.80 | 0.0224 |
| 8  | Sp245.Exp.Med | AX.89746318 | 2B | 575864365 | A | G | 176 | 136 | 40 | 18.82 | 4.1688 | 6.34E-06 | 5.20 | 0.0399 |
| 8  | Sp245.Exp.Med | AX.89385117 | 2B | 575865205 | T | C | 175 | 135 | 40 | 18.68 | 4.1723 | 7.55E-06 | 5.12 | 0.0432 |
| 8  | Sp245.Exp.Med | AX.89719394 | 2B | 575877955 | T | G | 176 | 127 | 49 | 17.86 | 3.8977 | 4.62E-06 | 5.34 | 0.0998 |
| 8  | Sp245.Exp.Med | AX.89472819 | 2B | 575930503 | C | G | 176 | 130 | 46 | 17.84 | 3.9761 | 7.27E-06 | 5.14 | 0.0337 |
| 8  | Sp245.Exp.Med | AX.89698767 | 2B | 575933438 | T | C | 176 | 153 | 23 | 24.44 | 5.1832 | 2.41E-06 | 5.62 | 0.0912 |
| 8  | Sp245.Exp.Med | AX.89540301 | 2B | 575934051 | C | T | 173 | 127 | 46 | 19.04 | 3.9884 | 1.81E-06 | 5.74 | 0.0188 |
| 8  | Sp245.Exp.Med | AX.89497267 | 2B | 581582603 | T | C | 176 | 163 | 13 | 30.71 | 6.6795 | 4.27E-06 | 5.37 | 0.5379 |
| 8  | Sp245.Exp.Med | AX.89711832 | 2B | 582645061 | G | A | 176 | 164 | 12 | 32.61 | 6.9310 | 2.55E-06 | 5.59 | 0.3777 |
| 9  | Sp245.Ind.Moy | AX.89668550 | 2B | 674029409 | G | T | 174 | 165 | 9  | 0.99  | 0.2079 | 2.00E-06 | 5.70 | 0.6496 |
| 10 | Sp245.Exp.Med | AX.89622005 | 2B | 688374113 | C | T | 176 | 168 | 8  | 37.88 | 8.3871 | 6.30E-06 | 5.20 | 0.0095 |
| 11 | Sp245.Ind.Moy | AX.89511582 | 2B | 757386253 | T | C | 174 | 162 | 12 | 0.81  | 0.1817 | 7.85E-06 | 5.10 | 0.8877 |
| 11 | Sp245.Ind.Moy | AX.89431594 | 2B | 757452859 | C | T | 174 | 163 | 11 | 0.86  | 0.1892 | 5.71E-06 | 5.24 | 0.9574 |
| 11 | Sp245.Ind.Moy | AX.89441916 | 2B | 758112233 | C | T | 174 | 163 | 11 | 0.86  | 0.1892 | 5.71E-06 | 5.24 | 0.9574 |
| 11 | Sp245.Ind.Moy | AX.89526336 | 2B | 758556708 | G | A | 174 | 163 | 11 | 0.86  | 0.1892 | 5.71E-06 | 5.24 | 0.9574 |
| 12 | Sp245.Ind.Moy | AX.89757265 | 2B | 759178940 | C | T | 174 | 162 | 12 | 0.84  | 0.1817 | 3.73E-06 | 5.43 | 0.2448 |
| 13 | Sp245.Exp.Med | AX.89467602 | 3A | 405321848 | A | G | 176 | 152 | 24 | 24.26 | 5.0908 | 1.88E-06 | 5.73 | 0.0218 |

|    |               |             |    |           |   |   |     |     |    |       |         |          |      |        |
|----|---------------|-------------|----|-----------|---|---|-----|-----|----|-------|---------|----------|------|--------|
| 14 | Sp245.Exp.Med | AX.89352119 | 3A | 644202467 | A | G | 176 | 161 | 15 | 27.85 | 6.2568  | 8.52E-06 | 5.07 | 0.6946 |
| 15 | Sp245.Ind.Moy | AX.89343547 | 3B | 697067059 | G | A | 174 | 166 | 8  | 1.12  | 0.2199  | 3.48E-07 | 6.46 | 0.8638 |
| 15 | Sp245.Ind.Moy | AX.89648213 | 3B | 697094433 | G | A | 174 | 166 | 8  | 1.12  | 0.2199  | 3.48E-07 | 6.46 | 0.8638 |
| 15 | Sp245.Ind.Moy | AX.89536337 | 3B | 697094560 | G | C | 174 | 166 | 8  | 1.12  | 0.2199  | 3.48E-07 | 6.46 | 0.8638 |
| 15 | Sp245.Ind.Moy | AX.89548989 | 3B | 697097583 | C | A | 174 | 166 | 8  | 1.12  | 0.2199  | 3.48E-07 | 6.46 | 0.8638 |
| 15 | Sp245.Ind.Moy | AX.89710913 | 3B | 697467601 | A | G | 174 | 166 | 8  | 1.12  | 0.2199  | 3.48E-07 | 6.46 | 0.8638 |
| 16 | Sp245.Ind.Med | AX.89467143 | 5B | 560451114 | T | C | 174 | 157 | 17 | 0.52  | 0.1164  | 7.97E-06 | 5.10 | 0.5848 |
| 16 | Sp245.Exp.Med | AX.89625435 | 5B | 560510249 | C | T | 176 | 160 | 16 | 27.76 | 6.0770  | 4.91E-06 | 5.31 | 0.5118 |
| 16 | Sp245.Ind.Med | AX.89625435 | 5B | 560510249 | C | T | 174 | 158 | 16 | 0.56  | 0.1196  | 2.38E-06 | 5.62 | 0.5118 |
| 16 | Sp245.Exp.Med | AX.89746797 | 5B | 560744181 | G | A | 176 | 162 | 14 | 33.62 | 6.4564  | 1.92E-07 | 6.72 | 0.9718 |
| 16 | Sp245.Ind.Med | AX.89746797 | 5B | 560744181 | G | A | 174 | 160 | 14 | 0.66  | 0.1271  | 1.94E-07 | 6.71 | 0.9718 |
| 16 | Sp245.Ind.Med | AX.89525713 | 5B | 562280657 | G | C | 174 | 151 | 23 | 0.47  | 0.1021  | 4.31E-06 | 5.37 | 0.7741 |
| 17 | Sp245.Exp.Med | AX.89488865 | 6A | 51947725  | C | T | 176 | 142 | 34 | 19.58 | 4.4251  | 9.70E-06 | 5.01 | 0.8022 |
| 17 | Sp245.Ind.Med | AX.89488865 | 6A | 51947725  | C | T | 174 | 142 | 32 | 0.40  | 0.0892  | 7.23E-06 | 5.14 | 0.8022 |
| 17 | Sp245.Exp.Med | AX.89734201 | 6A | 51951424  | C | A | 176 | 157 | 19 | 26.27 | 5.6297  | 3.06E-06 | 5.51 | 0.0394 |
| 17 | Sp245.Exp.Med | AX.89673138 | 6A | 51992351  | A | G | 176 | 156 | 20 | 25.90 | 5.5047  | 2.54E-06 | 5.60 | 0.0233 |
| 18 | Sp245.Ind.Moy | AX.89586813 | 6A | 540840475 | C | T | 174 | 162 | 12 | 0.84  | 0.1817  | 3.74E-06 | 5.43 | 0.4327 |
| 19 | Sp245.Ind.Moy | AX.89668441 | 6B | 703207585 | G | A | 174 | 161 | 13 | 0.83  | 0.1751  | 2.44E-06 | 5.61 | 0.5146 |
| 19 | Sp245.Ind.Moy | AX.89490161 | 6B | 703218204 | T | C | 174 | 160 | 14 | 0.77  | 0.1693  | 6.18E-06 | 5.21 | 0.5158 |
| 19 | Sp245.Ind.Moy | AX.89745923 | 6B | 703285156 | G | A | 174 | 160 | 14 | 0.77  | 0.1693  | 6.18E-06 | 5.21 | 0.5158 |
| 19 | Sp245.Exp.Med | AX.89635801 | 6B | 703286795 | G | T | 176 | 161 | 15 | 30.37 | 6.2568  | 1.21E-06 | 5.92 | 0.9284 |
| 19 | Sp245.Ind.Moy | AX.89393793 | 6B | 703298743 | C | T | 174 | 160 | 14 | 0.77  | 0.1693  | 6.18E-06 | 5.21 | 0.5158 |
| 19 | Sp245.Ind.Moy | AX.89471662 | 6B | 703834232 | C | T | 174 | 160 | 14 | 0.77  | 0.1693  | 6.18E-06 | 5.21 | 0.5158 |
| 19 | Sp245.Exp.Med | AX.89585079 | 6B | 704154311 | C | T | 176 | 156 | 20 | 24.87 | 5.5047  | 6.25E-06 | 5.20 | 0.2370 |
| 19 | Sp245.Ind.Moy | AX.89739667 | 6B | 704154523 | G | A | 174 | 160 | 14 | 0.77  | 0.1693  | 6.18E-06 | 5.21 | 0.5158 |
| 19 | Sp245.Exp.Med | AX.89580771 | 6B | 704176383 | A | G | 176 | 161 | 15 | 29.07 | 6.2568  | 3.39E-06 | 5.47 | 0.8336 |
| 19 | Sp245.Exp.Moy | AX.89438241 | 6B | 704189798 | G | C | 176 | 167 | 9  | 49.34 | 10.9991 | 7.28E-06 | 5.14 | 0.3121 |
| 19 | Sp245.Exp.Med | AX.89438241 | 6B | 704189798 | G | C | 176 | 167 | 9  | 38.07 | 7.9310  | 1.58E-06 | 5.80 | 0.3121 |
| 19 | Sp245.Ind.Moy | AX.89438241 | 6B | 704189798 | G | C | 174 | 165 | 9  | 0.95  | 0.2079  | 4.77E-06 | 5.32 | 0.3121 |
| 19 | Sp245.Exp.Med | AX.89414544 | 6B | 704189826 | T | C | 176 | 157 | 19 | 27.80 | 5.6297  | 7.86E-07 | 6.10 | 0.5723 |
| 19 | Sp245.Exp.Moy | AX.89414544 | 6B | 704189826 | T | C | 176 | 157 | 19 | 34.69 | 7.8074  | 8.84E-06 | 5.05 | 0.5723 |

|    |               |             |    |           |   |   |     |     |    |       |        |          |      |        |
|----|---------------|-------------|----|-----------|---|---|-----|-----|----|-------|--------|----------|------|--------|
| 19 | Sp245.Exp.Med | AX.89448288 | 6B | 704302928 | A | T | 176 | 160 | 16 | 27.43 | 6.0770 | 6.39E-06 | 5.19 | 0.9266 |
| 19 | Sp245.Exp.Med | AX.89331766 | 6B | 704303364 | G | C | 176 | 161 | 15 | 29.07 | 6.2568 | 3.39E-06 | 5.47 | 0.8336 |
| 19 | Sp245.Ind.Moy | AX.89725357 | 6B | 704303556 | A | G | 174 | 160 | 14 | 0.77  | 0.1693 | 6.18E-06 | 5.21 | 0.5158 |
| 19 | Sp245.Exp.Med | AX.89772533 | 6B | 704303985 | A | G | 176 | 151 | 25 | 23.29 | 5.0044 | 3.24E-06 | 5.49 | 0.0350 |
| 19 | Sp245.Exp.Med | AX.89499199 | 6B | 704304288 | C | T | 176 | 158 | 18 | 29.16 | 5.7656 | 4.25E-07 | 6.37 | 0.8539 |
| 19 | Sp245.Exp.Moy | AX.89499199 | 6B | 704304288 | C | T | 176 | 158 | 18 | 36.41 | 7.9960 | 5.28E-06 | 5.28 | 0.8539 |
| 19 | Sp245.Exp.Med | AX.89524992 | 6B | 704304308 | A | G | 176 | 161 | 15 | 29.07 | 6.2568 | 3.39E-06 | 5.47 | 0.8336 |
| 19 | Sp245.Exp.Med | AX.89622911 | 6B | 704304351 | A | G | 176 | 161 | 15 | 29.07 | 6.2568 | 3.39E-06 | 5.47 | 0.8336 |
| 19 | Sp245.Ind.Moy | AX.89502932 | 6B | 704305211 | T | C | 174 | 160 | 14 | 0.77  | 0.1693 | 6.18E-06 | 5.21 | 0.5158 |
| 19 | Sp245.Ind.Moy | AX.89410503 | 6B | 704505153 | C | T | 174 | 161 | 13 | 0.79  | 0.1751 | 5.68E-06 | 5.25 | 0.2027 |
| 19 | Sp245.Ind.Moy | AX.89503405 | 6B | 704505213 | T | C | 173 | 160 | 13 | 0.79  | 0.1752 | 5.70E-06 | 5.24 | 0.2128 |
| 19 | Sp245.Exp.Med | AX.89447957 | 6B | 704506160 | A | G | 176 | 154 | 22 | 26.83 | 5.2825 | 3.81E-07 | 6.42 | 0.1796 |
| 19 | Sp245.Exp.Med | AX.89479632 | 6B | 704507056 | G | C | 176 | 154 | 22 | 25.01 | 5.2825 | 2.20E-06 | 5.66 | 0.4508 |
| 19 | Sp245.Ind.Moy | AX.89570443 | 6B | 704507709 | T | C | 174 | 160 | 14 | 0.77  | 0.1693 | 6.18E-06 | 5.21 | 0.5158 |
| 19 | Sp245.Exp.Med | AX.89698906 | 6B | 704508272 | C | T | 176 | 146 | 30 | 21.45 | 4.6459 | 3.91E-06 | 5.41 | 0.1764 |
| 19 | Sp245.Ind.Moy | AX.89428743 | 6B | 704551936 | C | T | 174 | 160 | 14 | 0.77  | 0.1693 | 6.18E-06 | 5.21 | 0.5158 |
| 19 | Sp245.Ind.Moy | AX.89683104 | 6B | 704652484 | G | A | 174 | 160 | 14 | 0.77  | 0.1693 | 6.18E-06 | 5.21 | 0.5158 |
| 19 | Sp245.Ind.Moy | AX.89573171 | 6B | 704704787 | A | T | 174 | 161 | 13 | 0.83  | 0.1751 | 2.44E-06 | 5.61 | 0.5146 |
| 19 | Sp245.Ind.Moy | AX.89358001 | 6B | 704751665 | G | T | 174 | 160 | 14 | 0.77  | 0.1693 | 6.18E-06 | 5.21 | 0.5158 |
| 19 | Sp245.Exp.Med | AX.89426825 | 6B | 704788171 | C | T | 176 | 163 | 13 | 31.94 | 6.6795 | 1.74E-06 | 5.76 | 0.6120 |
| 19 | Sp245.Ind.Moy | AX.89426825 | 6B | 704788171 | C | T | 174 | 161 | 13 | 0.84  | 0.1751 | 1.70E-06 | 5.77 | 0.6120 |
| 19 | Sp245.Ind.Moy | AX.89474943 | 6B | 704790406 | G | A | 174 | 160 | 14 | 0.77  | 0.1693 | 6.18E-06 | 5.21 | 0.5158 |
| 19 | Sp245.Ind.Moy | AX.89590209 | 6B | 704860630 | A | T | 174 | 159 | 15 | 0.78  | 0.1641 | 2.08E-06 | 5.68 | 0.4926 |
| 19 | Sp245.Ind.Med | AX.89590209 | 6B | 704860630 | A | T | 174 | 159 | 15 | 0.55  | 0.1232 | 8.99E-06 | 5.05 | 0.4926 |
| 19 | Sp245.Ind.Moy | AX.89667199 | 6B | 704861385 | C | T | 174 | 159 | 15 | 0.79  | 0.1641 | 1.49E-06 | 5.83 | 0.4507 |
| 19 | Sp245.Ind.Med | AX.89667199 | 6B | 704861385 | C | T | 174 | 159 | 15 | 0.56  | 0.1232 | 5.72E-06 | 5.24 | 0.4507 |
| 19 | Sp245.Ind.Moy | AX.89627592 | 6B | 704882835 | C | G | 174 | 160 | 14 | 0.77  | 0.1693 | 6.18E-06 | 5.21 | 0.5158 |
| 19 | Sp245.Ind.Moy | AX.89587148 | 6B | 704883207 | C | G | 174 | 160 | 14 | 0.77  | 0.1693 | 6.18E-06 | 5.21 | 0.5158 |
| 19 | Sp245.Ind.Moy | AX.89354527 | 6B | 704883683 | C | T | 174 | 161 | 13 | 0.84  | 0.1751 | 1.70E-06 | 5.77 | 0.6120 |
| 19 | Sp245.Exp.Med | AX.89354527 | 6B | 704883683 | C | T | 176 | 163 | 13 | 31.94 | 6.6795 | 1.74E-06 | 5.76 | 0.6120 |
| 19 | Sp245.Ind.Moy | AX.89379712 | 6B | 704884899 | C | A | 174 | 160 | 14 | 0.77  | 0.1693 | 6.18E-06 | 5.21 | 0.5158 |

|    |               |             |    |           |   |   |     |     |    |       |        |          |      |               |
|----|---------------|-------------|----|-----------|---|---|-----|-----|----|-------|--------|----------|------|---------------|
| 19 | Sp245.Exp.Med | AX.89712251 | 6B | 704885060 | T | C | 176 | 163 | 13 | 30.66 | 6.6795 | 4.42E-06 | 5.35 | 0.5146        |
| 19 | Sp245.Ind.Moy | AX.89708135 | 6B | 704886333 | G | A | 174 | 160 | 14 | 0.77  | 0.1693 | 6.18E-06 | 5.21 | 0.5158        |
| 19 | Sp245.Ind.Moy | AX.89550611 | 6B | 704886431 | T | C | 174 | 160 | 14 | 0.77  | 0.1693 | 6.18E-06 | 5.21 | 0.5158        |
| 19 | Sp245.Ind.Moy | AX.89411948 | 6B | 704886786 | A | G | 174 | 160 | 14 | 0.77  | 0.1693 | 6.18E-06 | 5.21 | 0.5158        |
| 19 | Sp245.Ind.Moy | AX.89321148 | 6B | 704888976 | T | A | 174 | 160 | 14 | 0.77  | 0.1693 | 6.18E-06 | 5.21 | 0.5158        |
| 19 | Sp245.Ind.Moy | AX.89421975 | 6B | 704945976 | T | C | 174 | 160 | 14 | 0.77  | 0.1693 | 6.18E-06 | 5.21 | 0.5158        |
| 19 | Sp245.Ind.Moy | AX.89735767 | 6B | 704949137 | C | T | 174 | 160 | 14 | 0.77  | 0.1693 | 6.18E-06 | 5.21 | 0.5158        |
| 19 | Sp245.Ind.Moy | AX.89496681 | 6B | 704949468 | G | A | 174 | 160 | 14 | 0.77  | 0.1693 | 6.18E-06 | 5.21 | 0.5158        |
| 19 | Sp245.Ind.Moy | AX.89509555 | 6B | 704949487 | T | A | 174 | 160 | 14 | 0.77  | 0.1693 | 6.18E-06 | 5.21 | 0.5158        |
| 19 | Sp245.Ind.Moy | AX.89526184 | 6B | 704964940 | C | T | 174 | 160 | 14 | 0.77  | 0.1693 | 6.18E-06 | 5.21 | 0.5158        |
| 19 | Sp245.Ind.Moy | AX.89405827 | 6B | 704965201 | G | A | 174 | 159 | 15 | 0.80  | 0.1641 | 1.20E-06 | 5.92 | 0.4926        |
| 19 | Sp245.Ind.Med | AX.89405827 | 6B | 704965201 | G | A | 174 | 159 | 15 | 0.57  | 0.1232 | 3.50E-06 | 5.46 | 0.4926        |
| 19 | Sp245.Ind.Moy | AX.89733441 | 6B | 704976010 | G | A | 174 | 160 | 14 | 0.77  | 0.1693 | 6.18E-06 | 5.21 | 0.5158        |
| 19 | Sp245.Exp.Med | AX.89761693 | 6B | 705139561 | T | C | 176 | 163 | 13 | 30.66 | 6.6795 | 4.42E-06 | 5.35 | 0.5146        |
| 19 | Sp245.Ind.Moy | AX.89357867 | 6B | 705282230 | A | G | 174 | 160 | 14 | 0.77  | 0.1693 | 6.18E-06 | 5.21 | 0.5158        |
| 19 | Sp245.Ind.Moy | AX.89438186 | 6B | 705312685 | G | A | 174 | 156 | 18 | 0.67  | 0.1512 | 9.44E-06 | 5.03 | 0.6588        |
| 19 | Sp245.Ind.Moy | AX.89314150 | 6B | 705314997 | G | C | 174 | 155 | 19 | 0.67  | 0.1476 | 4.88E-06 | 5.31 | 0.8704        |
| 20 | Sp245.Ind.Moy | AX.89361492 | 6B | 159410401 | G | A | 174 | 163 | 11 | 0.86  | 0.1892 | 5.71E-06 | 5.24 | 0.9574        |
| 21 | Sp245.Exp.Med | AX.89500210 | 7A | 30092884  | G | A | 175 | 147 | 28 | 21.42 | 4.7790 | 7.41E-06 | 5.13 | <b>0.0019</b> |
| 22 | Sp245.Exp.Med | AX.89644216 | 7D | 93078495  | A | G | 176 | 160 | 16 | 27.24 | 6.0770 | 7.37E-06 | 5.13 | 0.3385        |
| 22 | Sp245.Exp.Med | AX.89622716 | 7D | 93094670  | T | A | 176 | 160 | 16 | 27.87 | 6.0770 | 4.51E-06 | 5.35 | 0.5848        |
| 22 | Sp245.Exp.Med | AX.89536477 | 7D | 93603574  | A | T | 176 | 161 | 15 | 30.72 | 6.2568 | 9.13E-07 | 6.04 | 0.5848        |
| 22 | Sp245.Exp.Med | AX.89512638 | 7D | 93605114  | T | C | 176 | 160 | 16 | 27.24 | 6.0770 | 7.37E-06 | 5.13 | 0.3385        |

† Using screening data in Valente et al. (2019) for *Pseudomonas kilonensis* F113, only one genetic marker (related to colonization rate) was identified (Trait, F113.Col.Moy; Marker, AX.89765457; Chromosome, 1A; Position, 14114969; A, A; B, T; NoMeasured, 178; NbA, 154; NbB, 24; effB, 10.09; SE\_effB, 2.26; p\_Marker, 8.14E-06; -log<sub>10</sub>(P), 5.09).
